# Supplementary material
Source: ML conference proceedings conference paper supplement (https://openreview.net/forum?id=AfiM6F2YPY)
Supplement: supplementary_material [file attachment]

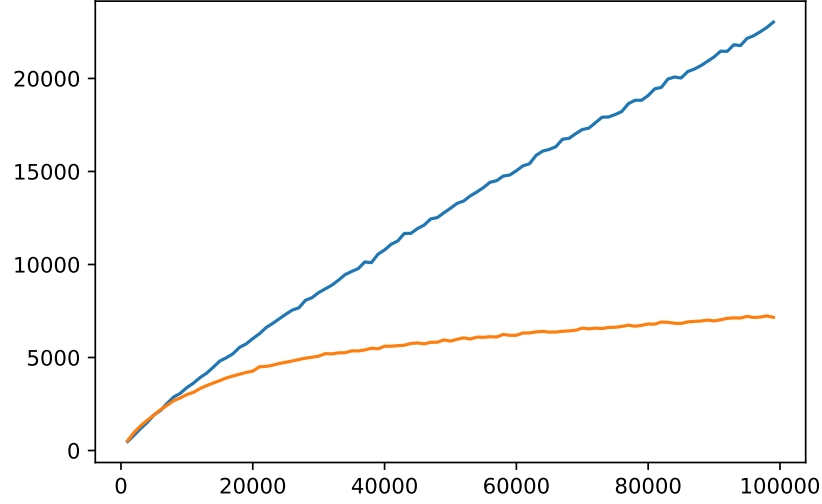

Figure 1: Number of generated unique words (of various lengths) in  $R_1$  in a sample w.r.t. a size of a sample. Blue line – bracket style sampling, orange line – naive sampling. Sampling parameters: **radius** = 10,  $n = 4$  generators.

| Word lengths  | 1   | 2   | 3    | 4    | 5    | 6    | 7    | 8    |
|---------------|-----|-----|------|------|------|------|------|------|
| Bracket-based | 1.0 | 1.0 | 1.0  | 1.0  | 1.0  | 1.0  | 0.74 | 0.25 |
| Naive         | 1.0 | 0.5 | 0.86 | 0.68 | 0.39 | 0.24 | 0.14 | 0.05 |

Table 1: Variability (number of generated unique words of given length divided by total number of words of given length) of bracket-style and naive sampler from  $R_1$ . Sampling parameters: sample size  $N = 10^5$ , **radius** = 10,  $n = 4$  generators.
